# Supplementary material for: Genomic Data Suggests Pathways of Modern White Poplar (<em>Populus alba </em>L.) Range Formation in the Postglacial Era
Source: Preprints.org preprint supplement (doi:10.20944/preprints202411.0073.v1), 2024-11-01
Supplement: Supplementary file 1 [file supplementary]

## Sheet: Лист1
Reference genome	SRA accession number	Research to which it corresponds
China-Irtysh-11	SRR7906161	https://www.ncbi.nlm.nih.gov/pubmed/30617214
China-Irtysh-12	SRR7906162	https://www.ncbi.nlm.nih.gov/pubmed/16952016
China-Beijing-1	SRR7906163	https://www.ncbi.nlm.nih.gov/pubmed/30617214
China-Beijing-2	SRR7906164	https://www.ncbi.nlm.nih.gov/pubmed/16952016
China-Beijing-3	SRR7906165	https://www.ncbi.nlm.nih.gov/pubmed/30617214
China-Irtysh-1	SRR7906174	https://www.ncbi.nlm.nih.gov/pubmed/16952016
China-Irtysh-2	SRR7906175	https://www.ncbi.nlm.nih.gov/pubmed/30617214
China-Irtysh-3	SRR7906176	https://www.ncbi.nlm.nih.gov/pubmed/16952016
China-Irtysh-4	SRR7906177	https://www.ncbi.nlm.nih.gov/pubmed/30617214
China-Irtysh-5	SRR7906178	https://www.ncbi.nlm.nih.gov/pubmed/16952016
China-Irtysh-6	SRR7906179	https://www.ncbi.nlm.nih.gov/pubmed/30617214
China-Irtysh-7	SRR7906180	https://www.ncbi.nlm.nih.gov/pubmed/16952016
China-Irtysh-8	SRR7906181	https://www.ncbi.nlm.nih.gov/pubmed/30617214
China-Irtysh-9	SRR7906182	https://www.ncbi.nlm.nih.gov/pubmed/16952016
China-Irtysh-10	SRR7906183	https://www.ncbi.nlm.nih.gov/pubmed/30617214
Italy-Maggia-1	SRR3678826	https://doi.org/10.1111/mec.13765
Italy-Maggia-2	SRR3678827	https://doi.org/10.1111/mec.13765
Italy-Ticino-1	SRR3678830	https://doi.org/10.1111/mec.13765
Italy-Ticino-2	SRR3678831	https://doi.org/10.1111/mec.13765
Hungary-1	SRR3678832	https://doi.org/10.1111/mec.13765
Hungary-2	SRR3678833	https://doi.org/10.1111/mec.13765
Hungary-Tisza	SRR3678834	https://doi.org/10.1111/mec.13765
China-Hoboksar	SRR11308202	https://doi.org/10.1098/rstb.2019.0544
China-Burqin	SRR11308203	https://doi.org/10.1098/rstb.2019.0544
China-Beitun	SRR11308205	https://doi.org/10.1098/rstb.2019.0544
China-Beitunzhen	SRR11308206	https://doi.org/10.1098/rstb.2019.0544
China-Altay-5	SRR11308207	https://doi.org/10.1098/rstb.2019.0544
Italy-Sinni	SRR11587873	https://doi.org/10.1038/s41477-020-0672-9
China-Xinjiang-1	SRR13324538	https://www.ncbi.nlm.nih.gov/pubmed/35185985
China-Xinjiang-2	SRR14066013	-
China-Xinjiang-3	SRR14066014	-
China-Xinjiang-4	SRR14066015	-
China-Xinjiang-5	SRR14066019	-
China-Xinjiang-6	SRR14066030	-
China-Xinjiang-7	SRR14066041	-
China-Xinjiang-8	SRR14066052	-
China-Xinjiang-9	SRR14066055	-
China-Xinjiang-10	SRR14066056	-
China-Xinjiang-11	SRR14066057	-
China-Xinjiang-12	SRR14066058	-
China-Xinjiang-13	SRR14066059	-
China-Xinjiang-14	SRR14066060	-
China-Xinjiang-15	SRR14066061	-
China-Altay-1	SRR14206945	-
China-Altay-2	SRR14206956	-
China-Altay-3	SRR14206957	-
China-Altay-4	SRR14206958	-
Populus tremula	SRR16779480	-
		“-” indicates that there is neither article nor preprint associated with this accession number in the Bioproject.
